# Supplementary material for: Plastic responses of bryozoans to ocean acidification
Source: Oxford University Press journal article supplement (doi:10.1242/jeb.163436), 2017-01-01
Supplement: jeb163436supp.pdf [file jeb163436supp.pdf]

| Sea Water Property                                         | Low CO <sub>2</sub>     | High CO <sub>2</sub>    | Significance |
|------------------------------------------------------------|-------------------------|-------------------------|--------------|
| Temperature (°C)                                           | 15.308 (15.305, 15.312) | 15.319 (15.316, 15.323) | P<0.0001     |
| Salinity                                                   | 33.72 (33.619, 33.821)  | 33.71 (33.635, 33.791)  | P=0.3669     |
| TA (μmol kg <sub>sw</sub> <sup>-1</sup> )                  | 2249 (2245, 2253)       | 2250 (2246, 2254)       | P=0.7388     |
| DIC <sub>calc</sub> (μmol kg <sub>sw</sub> <sup>-1</sup> ) | 2221 (2216, 2226)       | 2315 (2309, 2322)       | P<0.0001     |
| pH <sub>T</sub>                                            | 8.04 (8.03, 8.06)       | 7.60 (7.58, 7.63)       | P<0.0001     |
| pCO <sub>2CALC</sub>                                       | 400 (389, 412)          | 1254 (1213, 1296)       | P<0.0001     |
| Ω <sub>aragonite</sub>                                     | 2.34 (2.29, 2.40)       | .98 (.90, 1.07)         | P<0.0001     |
| Ω <sub>calcite</sub>                                       | 3.65 (3.57, 3.74)       | 1.53 (1.40, 1.66)       | P<0.0001     |

**Table S1. Experimental chemistry conditions.**

Mean carbonate system parameter values, 95% confidence intervals and significance of difference between low and high CO<sub>2</sub> treatments during the course of the study. Partial pressure of CO<sub>2</sub> (pCO<sub>2calc</sub>), aragonite and calcite saturation state (Ω<sub>aragonite/calcite</sub>) and total dissolved inorganic carbon (DIC<sub>calc</sub>) were calculated from the measured values of total alkalinity (TA), pH total (pHT), temperature and salinity. The significance of differences between CO<sub>2</sub> treatments were assessed using Student's t-test.

| Response Variable                                                                                 | Response Group           | LS Mean Estimate | SE    | Lower 95% CI | Upper 95% CI | Group Comparison                   | Difference | SE    | DF    | t-Ratio | p             | Lower 95% CI | Upper 95% CI |
|---------------------------------------------------------------------------------------------------|--------------------------|------------------|-------|--------------|--------------|------------------------------------|------------|-------|-------|---------|---------------|--------------|--------------|
| <b>Total Zooids Added</b>                                                                         |                          |                  |       |              |              |                                    |            |       |       |         |               |              |              |
|                                                                                                   | BMR Low CO <sub>2</sub>  | 101.48           | 13.89 | 72.34        | 130.63       | BMR Low - VD High CO <sub>2</sub>  | -53.85     | 18.46 | 46.90 | -2.92   | <b>0.005*</b> | -90.99       | 16.72        |
|                                                                                                   | BMR High CO <sub>2</sub> | 108.46           | 14.42 | 78.19        | 138.74       | BMR High - VD High CO <sub>2</sub> | -46.88     | 18.86 | 46.90 | -2.49   | <b>0.016*</b> | -84.82       | -8.94        |
|                                                                                                   | VD Low CO <sub>2</sub>   | 131.11           | 12.32 | 103.83       | 158.39       | VD Low - VD High CO <sub>2</sub>   | -24.23     | 11.90 | 46.90 | -2.04   | <b>0.047*</b> | -48.17       | -0.29        |
|                                                                                                   | VD High CO <sub>2</sub>  | 155.34           | 12.16 | 128.41       | 182.28       | BMR Low - VD Low CO <sub>2</sub>   | -29.62     | 18.56 | 46.90 | -1.60   | 0.117         | -66.97       | 7.73         |
|                                                                                                   |                          |                  |       |              |              | BMR High - VD Low CO <sub>2</sub>  | -22.65     | 18.96 | 46.90 | -1.19   | 0.238         | -60.79       | 15.50        |
|                                                                                                   |                          |                  |       |              |              | BMR Low - BMR High CO <sub>2</sub> | -6.98      | 13.49 | 46.90 | -0.52   | 0.607         | -34.11       | 20.16        |
| <b>Female Investment: log<sub>10</sub> (O+1)/([A<sub>F</sub>+A<sub>M</sub>+A<sub>B</sub>]+1):</b> |                          |                  |       |              |              |                                    |            |       |       |         |               |              |              |
|                                                                                                   | BMR Low CO <sub>2</sub>  | -0.66            | 0.05  | -0.77        | -0.55        | BMR Low - BMR High CO <sub>2</sub> | 0.12       | 0.05  | 21.00 | 2.30    | <b>0.031*</b> | 0.01         | 0.23         |
|                                                                                                   | BMR High CO <sub>2</sub> | -0.78            | 0.05  | -0.89        | -0.67        | VD Low - VD High CO <sub>2</sub>   | 0.11       | 0.04  | 13.90 | 2.35    | <b>0.034*</b> | 0.01         | 0.21         |
|                                                                                                   | VD Low CO <sub>2</sub>   | -0.67            | 0.04  | -0.77        | -0.58        | BMR Low - VD High CO <sub>2</sub>  | 0.12       | 0.07  | 25.10 | 1.78    | 0.087         | -0.01        | 0.27         |
|                                                                                                   | VD High CO <sub>2</sub>  | -0.79            | 0.04  | -0.88        | -0.69        | BMR High - VD Low CO <sub>2</sub>  | -0.10      | 0.07  | 25.50 | -1.52   | 0.141         | -0.25        | 0.03         |
|                                                                                                   |                          |                  |       |              |              | BMR Low - VD Low CO <sub>2</sub>   | 0.01       | 0.07  | 25.10 | 0.20    | 0.845         | -0.13        | 0.15         |

|                                                                      |                          |       |      |       |       |                                    |       |      |       |      |                   |       |       |
|----------------------------------------------------------------------|--------------------------|-------|------|-------|-------|------------------------------------|-------|------|-------|------|-------------------|-------|-------|
|                                                                      |                          |       |      |       |       | BMR High-VD High CO <sub>2</sub>   | 0.004 | 0.07 | 25.50 | 0.06 | 0.954             | -0.14 | 0.14  |
| <b>Male Investment: A<sub>m</sub>/(A<sub>m</sub>+A<sub>f</sub>):</b> |                          |       |      |       |       |                                    |       |      |       |      |                   |       |       |
|                                                                      | BMR Low CO <sub>2</sub>  | 0.41  | 0.03 | 0.35  | 0.47  | BMR Low - VD High CO <sub>2</sub>  | 0.08  | 0.04 | 18.77 | 2.08 | 0.051             | 0.01  | 0.16  |
|                                                                      | Co                       | 0.36  | 0.03 | 0.30  | 0.42  | BMR Low - BMR High CO <sub>2</sub> | 0.05  | 0.03 | 18.77 | 1.80 | 0.087             | -0.01 | 0.12  |
|                                                                      | VD Low CO <sub>2</sub>   | 0.36  | 0.03 | 0.31  | 0.42  | VD Low - VD High CO <sub>2</sub>   | 0.03  | 0.03 | 18.77 | 1.23 | 0.235             | -0.02 | 0.09  |
|                                                                      | VD High CO <sub>2</sub>  | 0.33  | 0.03 | 0.28  | 0.38  | BMR Low-VD Low CO <sub>2</sub>     | 0.05  | 0.04 | 18.77 | 1.20 | 0.245             | -0.03 | 0.13  |
|                                                                      |                          |       |      |       |       | BMR High - VD High CO <sub>2</sub> | 0.03  | 0.04 | 18.77 | 0.68 | 0.506             | -0.05 | 0.11  |
|                                                                      |                          |       |      |       |       | BMR High - VD Low CO <sub>2</sub>  | -0.01 | 0.04 | 18.77 | -    | 0.837             | -0.09 | 0.07  |
| <b>Degenerated Zooid %</b>                                           |                          |       |      |       |       |                                    |       |      |       |      |                   |       |       |
|                                                                      | BMR Low CO <sub>2</sub>  | 0.19  | 0.02 | 0.15  | 0.24  | BMR Low - BMR High CO <sub>2</sub> | -0.05 | 0.02 | 17.50 | -    | <b>0.044*</b>     | -0.09 | 0.01  |
|                                                                      | BMR High CO <sub>2</sub> | 0.24  | 0.02 | 0.19  | 0.29  | BMR Low - VD High CO <sub>2</sub>  | -0.05 | 0.03 | 17.50 | -    | 0.091             | -0.12 | 0.01  |
|                                                                      | VD Low CO <sub>2</sub>   | 0.23  | 0.02 | 0.19  | 0.27  | BMR Low - VD Low CO <sub>2</sub>   | -0.04 | 0.03 | 17.50 | -    | 0.249             | -0.10 | 0.03  |
|                                                                      | VD High CO <sub>2</sub>  | 0.25  | 0.02 | 0.20  | 0.29  | VD Low - VD High CO <sub>2</sub>   | -0.02 | 0.02 | 17.50 | -    | 0.332             | -0.06 | 0.02  |
|                                                                      |                          |       |      |       |       | BMR High - VD Low CO <sub>2</sub>  | 0.01  | 0.03 | 17.50 | 0.31 | 0.757             | -0.06 | 0.07  |
|                                                                      |                          |       |      |       |       | BMR High - VD High CO <sub>2</sub> | -0.01 | 0.03 | 17.50 | -    | 0.780             | -0.07 | 0.06  |
| <b>Colony CaCO<sub>3</sub> Weight (10<sup>-5</sup>g)</b>             |                          |       |      |       |       |                                    |       |      |       |      |                   |       |       |
|                                                                      | BMR Low CO <sub>2</sub>  | 64.49 | 2.11 | 60.18 | 68.81 | VD Low-VD High CO <sub>2</sub>     | 11.01 | 2.00 | 29.17 | 5.49 | <b>&lt;0.001*</b> | 6.91  | 15.11 |
|                                                                      | BMR High CO <sub>2</sub> | 51.69 | 2.18 | 47.23 | 56.15 | BMR Low - BMR High CO <sub>2</sub> | 12.80 | 2.03 | 29.17 | 6.31 | <b>&lt;0.001*</b> | 8.66  | 16.95 |
|                                                                      | VD Low CO <sub>2</sub>   | 57.96 | 1.99 | 53.81 | 62.10 | BMR Low - VD High CO <sub>2</sub>  | 17.54 | 2.88 | 29.17 | 6.09 | <b>&lt;0.001*</b> | 11.66 | 23.43 |
|                                                                      | VD High CO <sub>2</sub>  | 46.95 | 2.08 | 42.68 | 51.22 | BMR Low - VD Low CO <sub>2</sub>   | 6.54  | 2.83 | 29.17 | 2.31 | <b>0.028*</b>     | 0.75  | 12.32 |
|                                                                      |                          |       |      |       |       | BMR High                           | -6.27 | 2.8  | 29.   | -    | <b>0.03</b>       | -     | -0.38 |

|                                                                     |                          |        |       |       |       |                                    |       |      |       |       |                   |       |       |
|---------------------------------------------------------------------|--------------------------|--------|-------|-------|-------|------------------------------------|-------|------|-------|-------|-------------------|-------|-------|
|                                                                     |                          |        |       |       |       | - VD Low CO <sub>2</sub>           |       | 8    | 17    | 2.18  | <b>7*</b>         | 12.16 |       |
|                                                                     |                          |        |       |       |       | BMR High - VD High CO <sub>2</sub> | 4.74  | 2.93 | 29.17 | 1.62  | 0.116             | -1.25 | 10.73 |
| <b>Colony Organic Weight (10<sup>-5</sup>g)</b>                     |                          |        |       |       |       |                                    |       |      |       |       |                   |       |       |
|                                                                     | BMR Low CO <sub>2</sub>  | 16.86  | 2.35  | 12.19 | 21.53 | BMR Low - VD High CO <sub>2</sub>  | 7.64  | 3.02 | 88.0  | 2.53  | <b>0.013*</b>     | 1.60  | 13.65 |
|                                                                     | BMR High CO <sub>2</sub> | 10.06  | 2.312 | 5.47  | 14.66 | BMR Low - BMR High CO <sub>2</sub> | 6.80  | 3.30 | 88.0  | 2.06  | <b>0.042*</b>     | 0.24  | 13.35 |
|                                                                     | VD Low CO <sub>2</sub>   | 9.96   | 1.86  | 6.26  | 13.66 | BMR Low - VD Low CO <sub>2</sub>   | 6.90  | 3.00 | 88.0  | 2.30  | <b>0.024*</b>     | 0.94  | 12.86 |
|                                                                     | VD High CO <sub>2</sub>  | 9.22   | 1.9   | 5.45  | 12.99 | BMR High - VD High CO <sub>2</sub> | 0.84  | 2.99 | 88.0  | 0.28  | 0.778             | -5.10 | 6.79  |
|                                                                     |                          |        |       |       |       | VD Low - VD High CO <sub>2</sub>   | 0.74  | 2.66 | 88.0  | 0.28  | 0.782             | -4.50 | 6.03  |
|                                                                     |                          |        |       |       |       | BMR High - VD Low CO <sub>2</sub>  | 0.11  | 2.97 | 88.0  | 0.04  | 0.972             | -5.80 | 6.01  |
| <b>% of Zooids with Organic Coverings</b>                           |                          |        |       |       |       |                                    |       |      |       |       |                   |       |       |
|                                                                     | BMR Low CO <sub>2</sub>  | 0.01   | 0.01  | -0.01 | 0.02  | BMR Low - VD High CO <sub>2</sub>  | -0.09 | 0.01 | 19.16 | 10.97 | <b>&lt;0.001*</b> | -0.10 | -0.07 |
|                                                                     | BMR High CO <sub>2</sub> | 0.09   | 0.01  | 0.08  | 0.10  | BMR Low - BMR High CO <sub>2</sub> | -0.08 | 0.01 | 19.16 | 9.69  | <b>&lt;0.001*</b> | -0.10 | -0.07 |
|                                                                     | VD Low CO <sub>2</sub>   | 0.01   | 0     | 0     | 0.02  | VD Low - VD High CO <sub>2</sub>   | -0.08 | 0.01 | 19.16 | 11.90 | <b>&lt;0.001*</b> | -0.10 | -0.07 |
|                                                                     | VD High CO <sub>2</sub>  | 0.09   | 0.01  | 0.08  | 0.10  | BMR High - VD Low CO <sub>2</sub>  | 0.08  | 0.01 | 19.16 | 9.91  | <b>&lt;0.001*</b> | 0.06  | 0.10  |
|                                                                     |                          |        |       |       |       | BMR Low - VD Low CO <sub>2</sub>   | 0     | 0.01 | 19.16 | 0.60  | 0.553             | -0.02 | 0.01  |
|                                                                     |                          |        |       |       |       | BMR High - VD High CO <sub>2</sub> | 0     | 0.01 | 19.16 | 0.43  | 0.674             | -0.02 | 0.01  |
| <b>% of Zooids with Organic Coverings in Treatment Phase Growth</b> |                          |        |       |       |       |                                    |       |      |       |       |                   |       |       |
|                                                                     | BMR Low CO <sub>2</sub>  | 0.0006 | 0.01  | -0.01 | 0.02  | BMR Low - VD High                  | -0.13 | 0.01 | 25.51 | 13.0  | <b>&lt;0.001*</b> | -0.15 | -0.10 |

|                                     |                          |       |       |       |       |                                    |       |       |       |       |         |       |       |
|-------------------------------------|--------------------------|-------|-------|-------|-------|------------------------------------|-------|-------|-------|-------|---------|-------|-------|
|                                     |                          |       |       |       |       | CO <sub>2</sub>                    |       |       |       | 6     |         |       |       |
|                                     | BMR High CO <sub>2</sub> | 0.09  | 0.01  | 0.07  | 0.1   | VD Low - VD High CO <sub>2</sub>   | -0.13 | 0.01  | 25.51 | 14.69 | <0.001* | -0.15 | -0.10 |
|                                     | VD Low CO <sub>2</sub>   | 0     | 0.01  | -0.01 | 0.01  | BMR Low - BMR High CO <sub>2</sub> | -0.09 | 0.01  | 25.51 | 8.41  | <0.001* | -0.12 | -0.06 |
|                                     | VD High CO <sub>2</sub>  | 0.13  | 0.01  | 0.12  | 0.14  | BMR High - VD Low CO <sub>2</sub>  | 0.09  | 0.01  | 25.51 | 9.12  | <0.001* | 0.06  | 0.12  |
|                                     |                          |       |       |       |       | BMR High - VD High CO <sub>2</sub> | -0.04 | 0.01  | 25.51 | 3.93  | 0.003*  | -0.07 | -0.01 |
|                                     |                          |       |       |       |       | BMR Low - VD Low CO <sub>2</sub>   | 0     | 0.01  | 25.51 | 0.07  | 0.999   | -0.03 | 0.03  |
| <b>Mg/Ca<sub>c</sub></b>            |                          |       |       |       |       |                                    |       |       |       |       |         |       |       |
|                                     | VD Low CO <sub>2</sub>   | 0.035 | 0.001 | 0.032 | 0.038 | VD Low - VD High CO <sub>2</sub>   | 0.008 | 0.002 | 12.0  | 4.53  | 0.0007* | 0.004 | 0.01  |
|                                     | VD High CO <sub>2</sub>  | 0.027 | 0.001 | 0.024 | 0.029 |                                    |       |       |       |       |         |       |       |
| <b>Skeletal Wall Thickness (µm)</b> |                          |       |       |       |       |                                    |       |       |       |       |         |       |       |
|                                     | VD Low CO <sub>2</sub>   | 7.53  | 0.58  | 6.29  | 8.78  | VD Low - VD High CO <sub>2</sub>   | 1.68  | 0.82  | 13.81 | 2.05  | 0.059   | -0.08 | 3.43  |
|                                     | VD High CO <sub>2</sub>  | 5.85  | 0.58  | 4.61  | 7.09  |                                    |       |       |       |       |         |       |       |

**Table S2. Least squares group means estimates and significance assessments derived from mixed effects model output for colony response variables.**
